# Supplementary material
Source: PubMed Central journal article supplement (PMC5024704)
Supplement: bi6b00713_si_001.pdf [file bi6b00713_si_001.pdf]

# Crystal Structures of SgcE6 and SgcC, the Two-Component Monooxygenase that Catalyzes Hydroxylation of a Carrier Protein-Tethered Substrate in Biosynthesis of the Eneidyne Antitumor Antibiotic C-1027 in *Streptomyces globisporus*

Chin-Yuan Chang,<sup>1,†</sup> Jeremy R. Lohman,<sup>1,†</sup> Hongnan Cao,<sup>2</sup> Kemin Tan,<sup>3</sup> Jeffrey D. Rudolf,<sup>1</sup> Ming Ma,<sup>1</sup> Weijun Xu,<sup>2</sup> Craig A. Bingman,<sup>4</sup> Ragothaman M. Yennamalli,<sup>2,5</sup> Lance Bigelow,<sup>3</sup> Gyorgy Babnigg,<sup>3</sup> Xiaohui Yan,<sup>1</sup> Andrzej Joachimiak,<sup>3</sup> George N. Phillips, Jr.,<sup>2</sup> and Ben Shen\*,<sup>1,6,7</sup>

<sup>1</sup>Department of Chemistry, The Scripps Research Institute, Jupiter, FL 33458, United States;

<sup>2</sup>BioScience at Rice and Department of Chemistry, Rice University, Houston, TX 77251,

United States; <sup>3</sup>Midwest Center for Structural Genomics and Structural Biology Center,

Biosciences Division, Argonne National Laboratory, Argonne, IL 60439, United States;

<sup>4</sup>Department of Biochemistry, University Wisconsin-Madison, Madison, WI 53705, United

States; <sup>5</sup>Department of Biotechnology and Bioinformatics, Jaypee University of Information

Technology, Waknaghat, Himachal Pradesh, India 173234, and <sup>6</sup>Department of Molecular

Therapeutics and <sup>7</sup>Natural Products Library Initiative at The Scripps Research Institute, The

Scripps Research Institute, Jupiter, FL 33458, United States

<sup>†</sup>These authors contributed equally

\*Correspondence: E-mail: [shenb@scripps.edu](mailto:shenb@scripps.edu). Telephone: (561) 228-2456. Fax: (561) 228-2472.

## Supporting Information

|                    |                                                             |     |
|--------------------|-------------------------------------------------------------|-----|
| <b>Table S1.</b>   | Primers and vectors used in this study                      | S2  |
| <b>Table S2.</b>   | Homologues of SgcE6 discussed in this study                 | S3  |
| <b>Table S3.</b>   | Homologues of SgcC discussed in this study                  | S5  |
| <b>Figure S1.</b>  | The top ten templates used by I-TASSER for SgcC2 modeling   | S7  |
| <b>Figure S2.</b>  | Sequence alignment of SgcE6 with selected homologues        | S8  |
| <b>Figure S3.</b>  | Sequence alignment of SgcC with selected homologues         | S9  |
| <b>Figure S4.</b>  | Stereoimage of SgcE6 monomer alignment                      | S10 |
| <b>Figure S5.</b>  | Structural comparison of SgcE6 with other flavin reductases | S11 |
| <b>Figure S6.</b>  | Molecular weight estimation of SgcE6 and SgcC               | S12 |
| <b>Figure S7.</b>  | Reactions carried out by SgcC homologous enzymes            | S13 |
| <b>Figure S8.</b>  | Structure based sequence alignment identity matrix          | S14 |
| <b>Figure S9.</b>  | Comparison of SgcC and TtHpaB in stereograms                | S15 |
| <b>Figure S10.</b> | Active site of AbHpaH                                       | S16 |
| <b>Figure S11.</b> | The SgcC-SgcC2 docking model                                | S17 |
| References         |                                                             | S18 |

**Table S1.** Primers and vectors used in this study.

| <b>Plasmid</b>         | <b>PCR primers</b>                                     | <b>Cloning vector</b> |
|------------------------|--------------------------------------------------------|-----------------------|
| APC109096<br>(pBS1159) | SgcE6-F: 5'-TACTTCCAATCCAATGCCATGAGTCCGATCATCGCTCCG-3' | pMCSG73               |
|                        | SgcE6-R: 5'-TTATCCACTTCCAATGTTATGCCGCCCTTCCTTCGTCC-3'  |                       |
| APC109081<br>(pBS1160) | SgcC-F: 5'-AAAACCTCTATTTCCAGTCGCCCCACGGTGCAGAGCGCG-3'  | pBS3080               |
|                        | SgcC-R: 5'-TACTTACTTAAATGTTACAGCCCTCCGAGAAGGTCTG-3'    |                       |

**Table S2.** Homologues of SgcE6 discussed in this study.

| Organism                                                                       | Abbreviation | Substrate<br>(Fixed concentration) | Second substrate | $K_m$ ( $\mu\text{M}$ ) | $K_{cat}$ ( $\text{s}^{-1}$ ) | DALI analysis    |                |                   |                   |                   | Accession number | PDB ID           | Reference |
|--------------------------------------------------------------------------------|--------------|------------------------------------|------------------|-------------------------|-------------------------------|------------------|----------------|-------------------|-------------------|-------------------|------------------|------------------|-----------|
|                                                                                |              |                                    |                  |                         |                               | %id <sup>a</sup> | Z <sup>b</sup> | rmsd <sup>c</sup> | lali <sup>d</sup> | nres <sup>e</sup> |                  |                  |           |
| <i>Streptomyces globisporus</i>                                                | SgcE6        | FAD                                | NADH             | 8.2                     | 4.5                           | -                | -              | -                 | -                 | -                 | AAL06698         | 4R82, 4HX6       | 1         |
|                                                                                |              | FMN                                | NADH             | Very low activity       |                               |                  |                |                   |                   |                   |                  |                  |           |
|                                                                                |              | NADH                               | FAD              | 53                      | 3.1                           |                  |                |                   |                   |                   |                  |                  |           |
|                                                                                |              | NADPH                              | FAD              | Below detection         |                               |                  |                |                   |                   |                   |                  |                  |           |
| <i>Thermus thermophilus</i> HB8                                                | TtHpaC       | FAD                                | NADH             | 8.9                     | 2.4                           | 33               | 22.5           | 1.6               | 147               | 149               | BAD70784         | 2ED4, 2ECR, 2ECU | 2         |
|                                                                                |              | FMN                                | NADH             | 39.6                    | 2.7                           |                  |                |                   |                   |                   |                  |                  |           |
|                                                                                |              | NADH                               | FAD              | 36.8                    | 0.7                           |                  |                |                   |                   |                   |                  |                  |           |
|                                                                                |              | NADPH                              | FAD              | Below detection         |                               |                  |                |                   |                   |                   |                  |                  |           |
| <i>Bacillus thermoglucosidasius</i> A7                                         | BtPheA2      | FAD                                | NADH             | 1.5                     | 252                           | 34               | 24.1           | 1.4               | 149               | 153               | AAF66547         | 1RZ1, 1RZ0       | 3, 4      |
|                                                                                |              | FMN                                | NADH             | 5.4                     | 279                           |                  |                |                   |                   |                   |                  |                  |           |
|                                                                                |              | NADH                               | FAD              | 8.8                     | 225                           |                  |                |                   |                   |                   |                  |                  |           |
|                                                                                |              | NADPH                              | FAD              | Very low activity       |                               |                  |                |                   |                   |                   |                  |                  |           |
| <i>Burkholderia cepacia</i> AC1100                                             | BcTftC       | FAD                                | NADH             | 4.8                     | 16.6                          | 22               | 22.6           | 1.9               | 156               | 164               | AAC23547         | 3K88, 3K87, 3K86 | 5         |
|                                                                                |              | FMN                                | NADH             | 10.3                    | 18.5                          |                  |                |                   |                   |                   |                  |                  |           |
|                                                                                |              | NADH                               | FAD              | 40                      | 30.1                          |                  |                |                   |                   |                   |                  |                  |           |
|                                                                                |              | NADPH                              | FAD              | Not performed           |                               |                  |                |                   |                   |                   |                  |                  |           |
| <i>Pseudomonas putida</i> S12<br>( <i>Pseudomonas</i> sp. VLB120) <sup>f</sup> | PpSMOB       | FAD                                | NADH             | 11.6                    | 47                            | 28               | 22.2           | 1.7               | 149               | 152               | AJA17114         | 4F07             | 6         |
|                                                                                |              | FMN                                | NADH             | 7.1                     | 48                            |                  |                |                   |                   |                   |                  |                  |           |
|                                                                                |              | NADH                               | FMN              | 20.1                    | 60                            |                  |                |                   |                   |                   |                  |                  |           |
|                                                                                |              | NADPH                              | FMN              | Below detection         |                               |                  |                |                   |                   |                   |                  |                  |           |
| <i>Mycobacterium thermoresistibile</i>                                         | MtMOB        | No experimental evidence           |                  |                         |                               | 32               | 23.2           | 1.9               | 60                | 181               | ADR80228         | 3NFW             | 7         |

|                                             |         |                                                                                                          |         |                                                    |                                                   |                  |      |     |     |     |          |                        |        |  |
|---------------------------------------------|---------|----------------------------------------------------------------------------------------------------------|---------|----------------------------------------------------|---------------------------------------------------|------------------|------|-----|-----|-----|----------|------------------------|--------|--|
| <i>Sulfolobus tokodaii</i>                  | StHpaC  | FMN                                                                                                      | NADH    | Relative activity: 100%                            |                                                   | 24               | 22.1 | 1.6 | 152 | 155 | BAB65731 | 2D37,<br>2D36,<br>2D38 | 8      |  |
|                                             |         | FMN                                                                                                      | NADPH   | Relative activity: 5.4%                            |                                                   |                  |      |     |     |     |          |                        |        |  |
|                                             |         | FAD                                                                                                      | NADH    | Relative activity: 67.5%                           |                                                   |                  |      |     |     |     |          |                        |        |  |
| <i>Thermus thermophilus</i>                 | TtFMNbp | NADPH                                                                                                    | FMN     | $K_d = 17$                                         | $K_{red} = 0.15$                                  | 23               | 21.0 | 2.0 | 161 | 175 | BAD71681 | 2ZOE,<br>1USC,<br>1USF | 9      |  |
|                                             |         | NADH                                                                                                     | FMN     | $K_d = 300$                                        | $K_{red} = 0.25$                                  |                  |      |     |     |     |          |                        |        |  |
|                                             |         | NADPH                                                                                                    | FAD     | No experimental evidence                           |                                                   |                  |      |     |     |     |          |                        |        |  |
|                                             |         | NADH                                                                                                     | FAD     | No experimental evidence                           |                                                   |                  |      |     |     |     |          |                        |        |  |
| <i>Pyrococcus horikoshii</i>                | PhFMNbp | NADPH                                                                                                    | FMN     | $K_d = 114$                                        | $K_{red} = 0.06$                                  | 21               | 20.4 | 2.0 | 156 | 176 | BAA29950 | 3ZOC,<br>2R6V          | 9      |  |
|                                             |         | NADH                                                                                                     | FMN     | Below detection                                    |                                                   |                  |      |     |     |     |          |                        |        |  |
|                                             |         | NADPH                                                                                                    | FAD     | No experimental evidence                           |                                                   |                  |      |     |     |     |          |                        |        |  |
|                                             |         | NADH                                                                                                     | FAD     | No experimental evidence                           |                                                   |                  |      |     |     |     |          |                        |        |  |
| <i>Methanobacterium thermoautotrophicum</i> | MtFMNbp | Structural biology evidence: protein complex with FMN.<br>No experimental evidence for other substrates. |         |                                                    |                                                   | 21               | 19.4 | 2.2 | 159 | 192 | AAB84658 | 1EJE                   | 10     |  |
| <i>Archaeoglobus fulgidus</i>               | AfFeR   | FMN                                                                                                      | NADPH   | $V_{max} = 280 \mu\text{mol}/\text{min}/\text{mg}$ |                                                   | 25               | 20.4 | 2.6 | 150 | 161 | AAB90418 | 110S,<br>110R          | 11, 12 |  |
|                                             |         | FAD                                                                                                      | NADPH   | $V_{max} = 350 \mu\text{mol}/\text{min}/\text{mg}$ |                                                   |                  |      |     |     |     |          |                        |        |  |
|                                             |         | NADPH                                                                                                    | FMN     | 0.3                                                | Not performed                                     |                  |      |     |     |     |          |                        |        |  |
|                                             |         | NADH                                                                                                     | FMN/FAD | Not performed                                      |                                                   |                  |      |     |     |     |          |                        |        |  |
| <i>Escherichia coli</i> W                   | EcHpaC  | FMN                                                                                                      | NADH    | 2.1                                                | $V_{max} = 70 \mu\text{mol}/\text{min}/\text{mg}$ | 27 (by<br>BLAST) |      |     |     |     | ADT77975 |                        | 13     |  |
|                                             |         | FAD                                                                                                      | NADH    | 3.1                                                | $V_{max} = 38 \mu\text{mol}/\text{min}/\text{mg}$ |                  |      |     |     |     |          |                        |        |  |
|                                             |         | NADH                                                                                                     | FMN     | 40                                                 | Not performed                                     |                  |      |     |     |     |          |                        |        |  |
|                                             |         | NADPH                                                                                                    | FMN     | Not performed                                      |                                                   |                  |      |     |     |     |          |                        |        |  |

<sup>a</sup>%id: percentage of identical amino acids over structurally equivalent residues. <sup>b</sup>Z score: the statistical significance of the similarity between protein-of-interest and other neighbourhood proteins. <sup>c</sup>rmsd: root-mean-square deviation of C $\alpha$  atoms in the least-squares superimposition of the structurally equivalent C $\alpha$  atoms. <sup>d</sup>lali: the number of structurally equivalent residues. <sup>e</sup>nres: the total number of amino acids in the hit protein. <sup>f</sup>The kinetics statistics referred to that of the flavin reductase from *Pseudomonas* sp. VLB120. The amino acid sequence identity of PpSMOB and the flavin reductase from *Pseudomonas* sp. VLB120 is 94%.

**Table S3.** Homologues of SgcC discussed in this study.

| Organism                                                                          | Abbreviation       | Flavin                   | Function                                                                | %id <sup>a</sup> | DALI analysis  |                   |                   |                   | Accession number | PDB ID                             | Reference  |
|-----------------------------------------------------------------------------------|--------------------|--------------------------|-------------------------------------------------------------------------|------------------|----------------|-------------------|-------------------|-------------------|------------------|------------------------------------|------------|
|                                                                                   |                    |                          |                                                                         |                  | Z <sup>b</sup> | rmsd <sup>c</sup> | Iali <sup>d</sup> | nres <sup>e</sup> |                  |                                    |            |
| <i>Streptomyces globisporus</i>                                                   | SgcC               | FAD                      | (S)-3-chloro- $\beta$ -tyrosyl-S-peptidyl carrier protein 5-hydroxylase | -                | -              | -                 | -                 | -                 | AAL06674         | 4OO2                               | 14         |
| <i>Thermus thermophilus</i> HB8                                                   | TtHpaB             | FAD                      | 4-hydroxyphenylacetate-3-hydroxylase                                    | 34               | 49.6           | 1.9               | 468               | 470               | BAD70783         | 2YYJ, 2YYG, 2YYI, 2YYK, 2YYL, 2YYM | 15         |
| <i>Burkholderia cepacia</i> AC1100                                                | BcTftD             | FAD                      | chlorophenol 4-monooxygenase                                            | 26               | 42.7           | 2.3               | 461               | 482               | AAC23548         | 3HWC                               | 5          |
| <i>Cupriavidus necator</i> JMP134 ( <i>Ralstonia eutropha</i> )                   | CnTcA              | FAD                      | 2,4,6-trichlorophenol 4-monooxygenase                                   | 22               | 22.6           | 1.9               | 156               | 164               | AAZ60952         | 4G5E                               | 16         |
| <i>Pseudomonas aeruginosa</i> PAO1                                                | PaHpaA             | FAD                      | 4-hydroxyphenylacetate 3-monooxygenase                                  | 51               | /              |                   |                   |                   | AAG07478         | /                                  | 17, 18     |
| <i>Escherichia coli</i>                                                           | EcHpaB             | FAD                      | 4-hydroxyphenylacetic hydroxylase                                       | 50               | /              |                   |                   |                   | ADT77976         | /                                  | 19, 20, 21 |
| <i>Bacillus thermoglucosidasius</i> A7 ( <i>Geobacillus thermoglucosidasius</i> ) | BtPheA1            | FAD                      | phenol 2-hydroxylase                                                    | 51               | /              |                   |                   |                   | AAF66546         | /                                  | 22         |
| <i>Pseudomonas aeruginosa</i> PAO1                                                | PaPvcC             | No experimental evidence | putative hydroxylase (involved in pyoverdine chromophore biosynthesis)  | 42               | /              |                   |                   |                   | AAG05644         | /                                  | 23, 24     |
| <i>Geobacillus thermodenitrificans</i> NG80-2                                     | GtHpaH (GNTG_3160) | FAD                      | putative aromatic compound hydroxylase                                  | 33               | /              |                   |                   |                   | ABO68505         | /                                  | 25         |
| <i>Geobacillus</i> sp. PA-9                                                       | GpHpaH             | No experimental evidence | 4-hydroxyphenylacetic acid 3-hydroxylase                                | 30               | /              |                   |                   |                   | AAT28189         | /                                  | 26         |
| <i>Rhodococcus opacus</i> SAO101 ( <i>Bacillus sphaericus</i> JS905)              | RoNpcA             | FAD                      | 4-nitrophenol 4-monooxygenase                                           | 28               | /              |                   |                   |                   | BAD30042         | /                                  | 27         |
| <i>Arthrobacter</i> sp. JS443                                                     | AjNpdA2            | FAD                      | 4-nitrophenol monooxygenase                                             | 28               | /              |                   |                   |                   | ABL75143         | /                                  | 28         |
| <i>Oscillatoria</i> sp. PCC 6506                                                  | AnaB               | FAD                      | prolyl-ACP dehydrogenase                                                | 10               | 21.5           | 3.2               | 313               | 378               | CBN59192         | 4IRN                               | 29         |

|                                                             |        |     |                                                          |    |      |     |     |     |          |                  |           |
|-------------------------------------------------------------|--------|-----|----------------------------------------------------------|----|------|-----|-----|-----|----------|------------------|-----------|
| <i>Streptomyces hygroscopicus</i> subsp. <i>ascofeticus</i> | Fkbl   | FAD | acyl-ACP dehydrogenase                                   | 16 | 20.4 | 2.9 | 298 | 353 | AAF86388 | 1R2J             | <b>30</b> |
| <i>Acinetobacter baumannii</i>                              | AbHpaH | FMN | <i>p</i> -hydroxyphenylacetate hydroxylase               | 7  | 16.2 | 3.5 | 301 | 399 | AAS75429 | 2JBT, 2JBR, 2JBS | <b>31</b> |
| <i>Bacillus circulans</i>                                   | BtrO   | FMN | 4-( $\gamma$ -L-glutamylamino)butanoyl-ACP monooxygenase |    |      |     |     |     | BAE07076 |                  | <b>32</b> |

<sup>a</sup>%id: amino acid sequence identity. <sup>b</sup>Z score: the statistical significance of the similarity between protein-of-interest and other neighbourhood proteins. <sup>c</sup>rmsd: root-mean-square deviation of C $\alpha$  atoms in the least-squares superimposition of the structurally equivalent C $\alpha$  atoms. <sup>d</sup>lali: the number of structurally equivalent residues. <sup>e</sup>nres: the total number of amino acids in the hit protein.



**Figure S2.** Sequence alignment of SgcE6 with other 9-membered enediye gene cluster homologues. Accession numbers are shown in front of their sequences. Aligned residues are colored on the basis of the level of conservation (red box with white character or red character with bold font shows strict identity, red character similarity, and blue frame similarity across group). The sequence in red and magenta correlates with either NADH or NADPH preference, the regions in orange and yellow correlate with FMN or FAD preference and the regions in green and cyan highlight the (S/T/C)XXPP and GDH motifs, respectively. The yellow region corresponds to the “flexible AMP binding loop”.

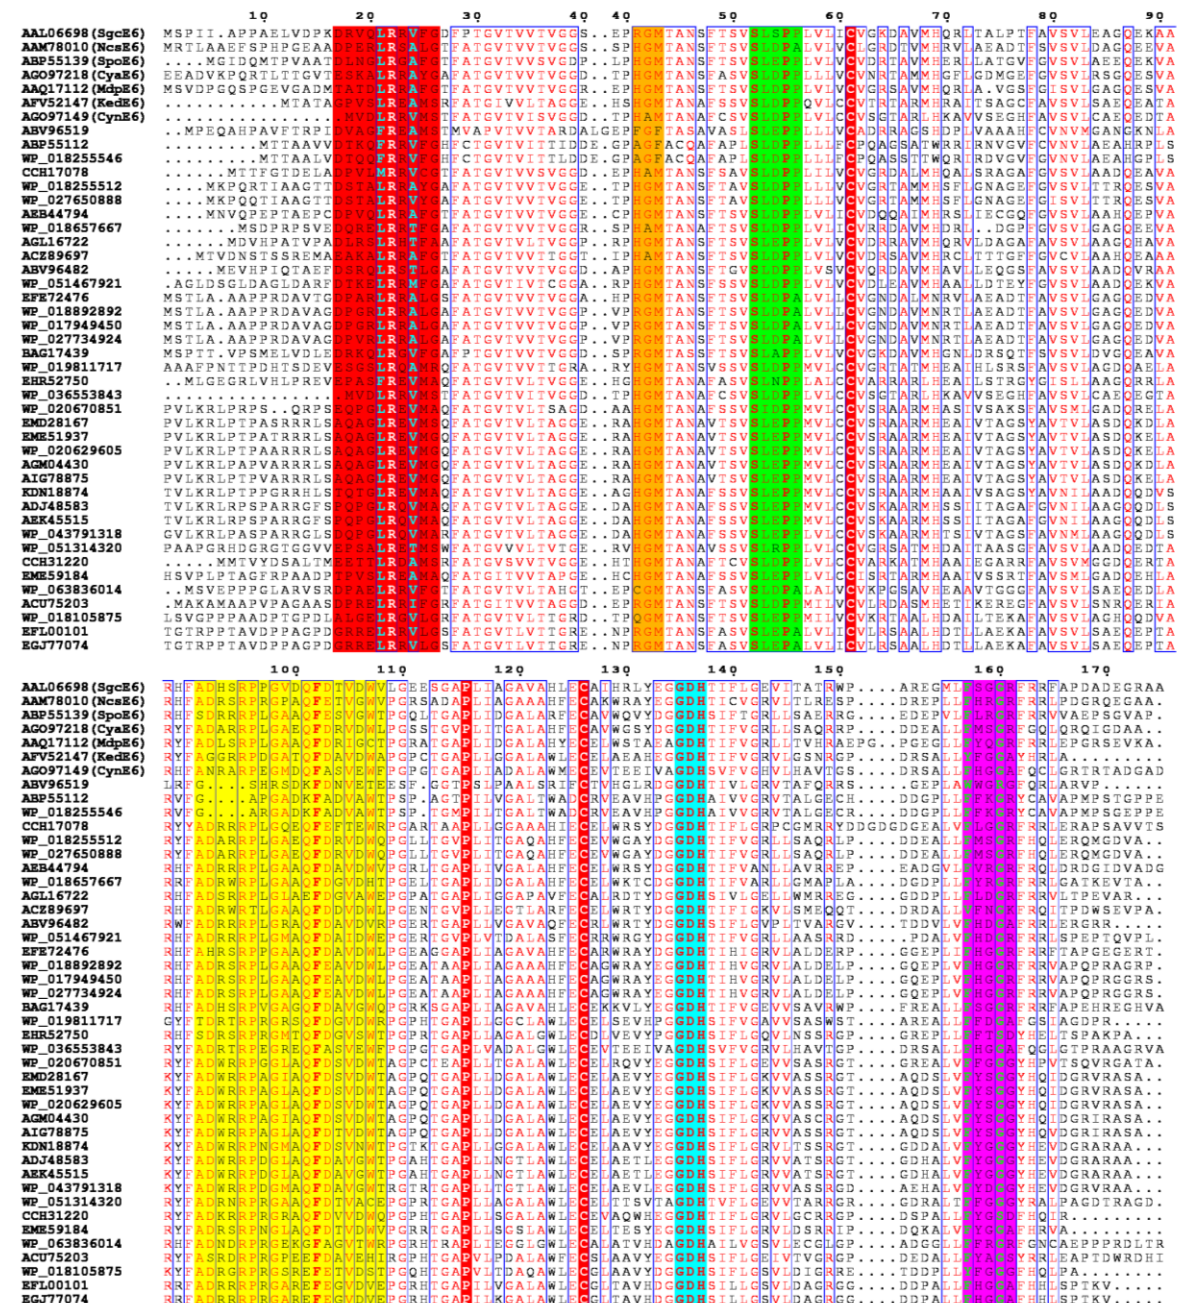



**Figure S3.** Sequence alignment of SgcC with other 9-membered enediyne gene cluster homologues. Accession numbers are shown in front of their sequences. Aligned residues are colored on the basis of the level of conservation (red box with white character or red character with bold font shows strict identity, red character similarity, and blue frame similarity across group). The regions in yellow, green and magenta are putative flavin binding loop, substrate binding loop and AMP responsive loop, respectively.

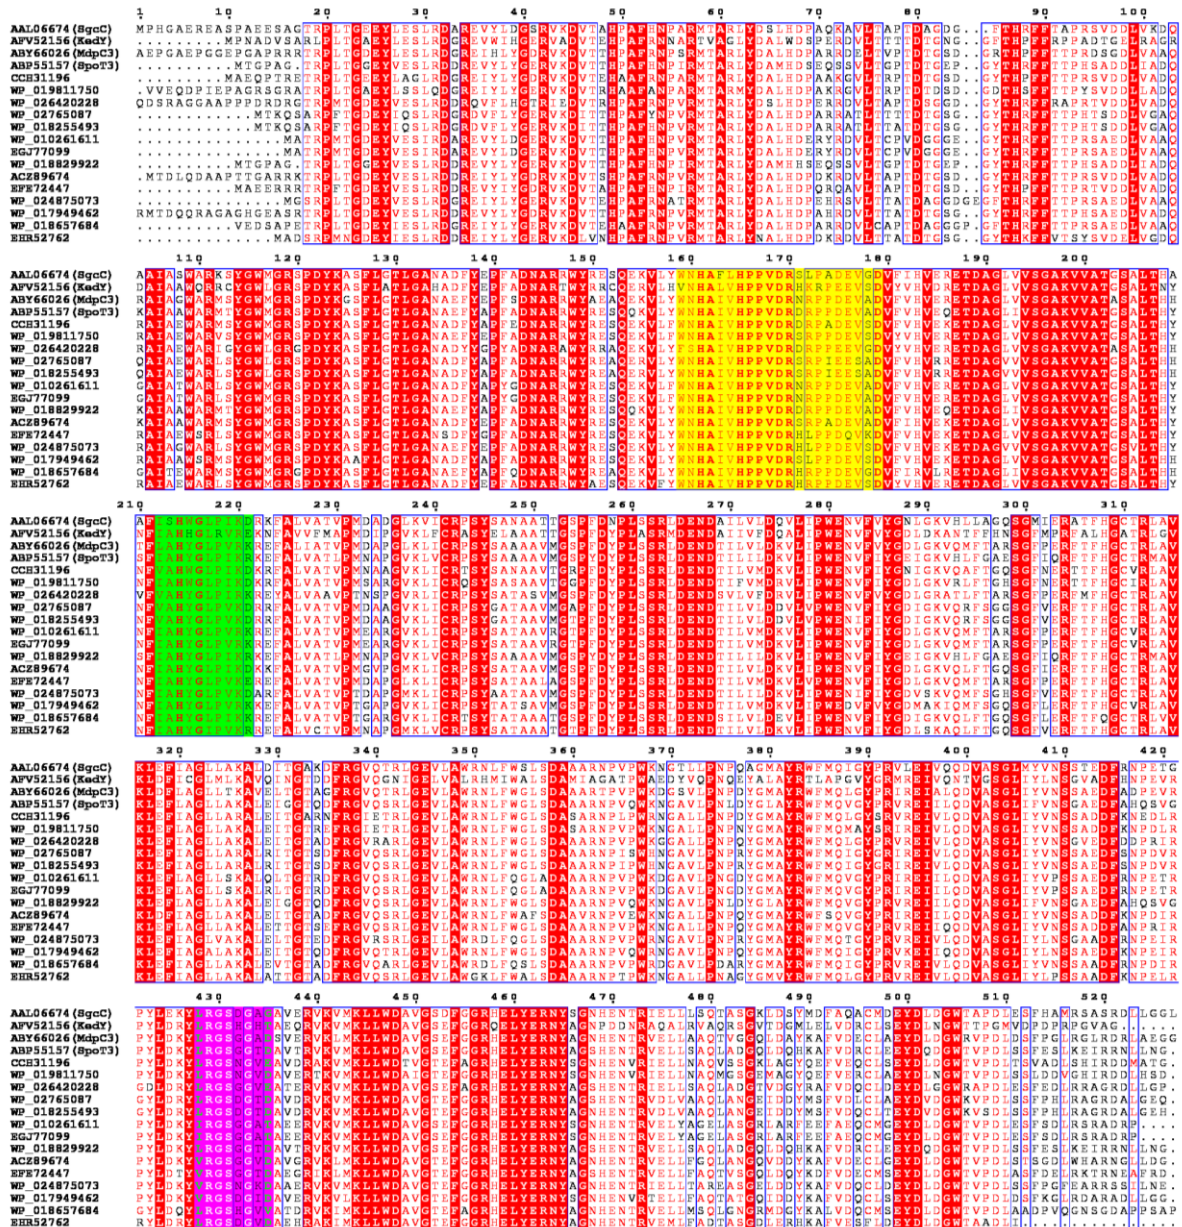

**Figure S4.** Stereoimage of SgcE6 monomer alignment. The N-terminus, C-terminus and flexible loop are highly variable in position. SgcE6-FAD chain A-black, Apo-SgcE, chain A-green, B-cyan, C-magenta, D-yellow, E-salmon, F-white, G-slate, H-orange.

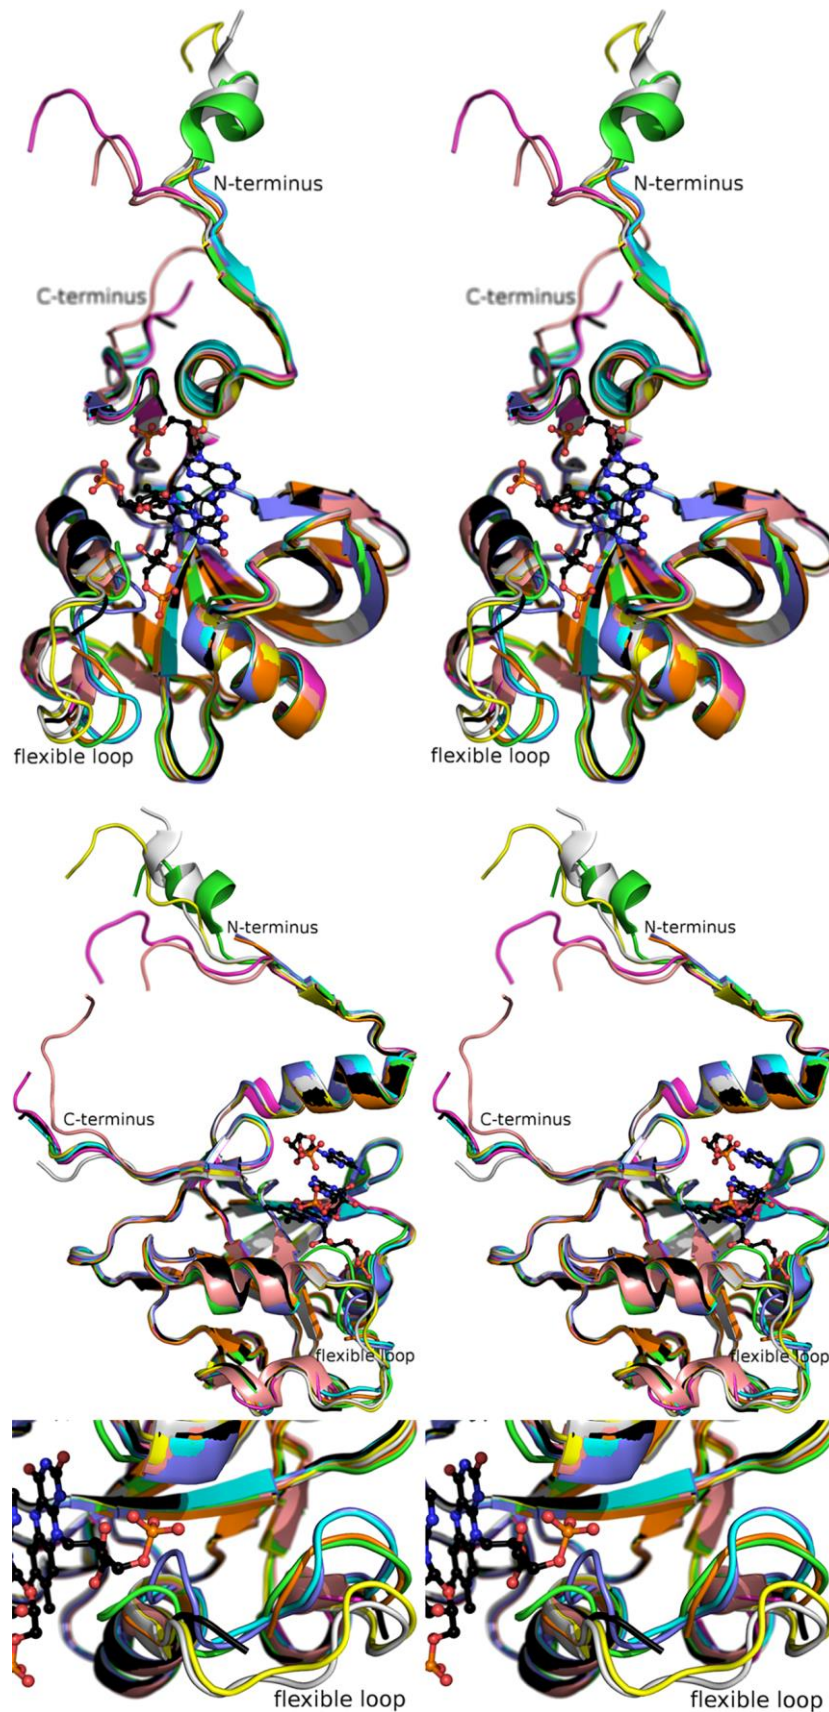

**Figure S5.** Structural comparison of SgcE6 with other flavin reductases. Colored as seen in Figure 2. The C-terminal loop of MtMOB, which is colored in black, extends into the active site.

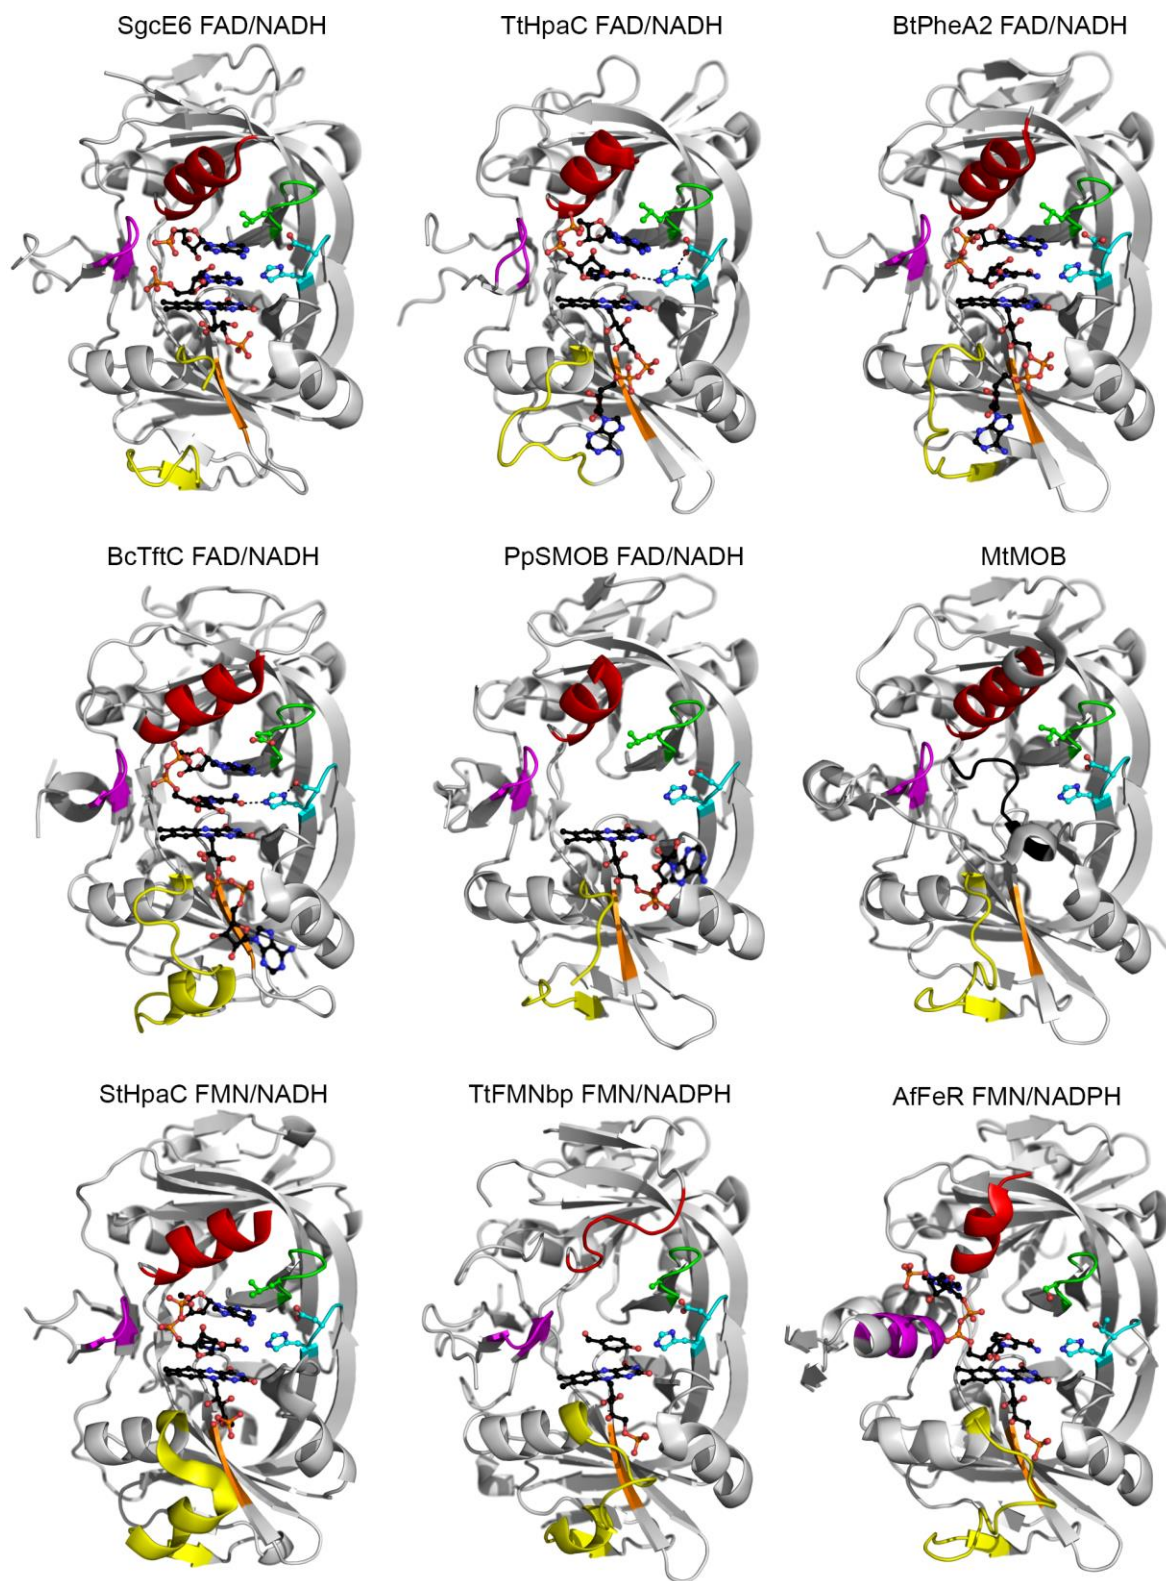

**Figure S6.** Molecular weight estimation of SgcE6 and SgcC by size exclusion chromatography. (a) SgcE6 and (b) SgcC on a Superdex 200 16/600 column (GE Healthcare Life Science). The apparent molecule weights of SgcE6 and SgcC were estimated to be 46.1 kDa and 209.7 kDa, suggesting that SgcE6 (calculated molecular weight of 19.5 kDa) and SgcC (calculated molecular weight of 57.9 kDa) are dimer and tetramer, respectively.

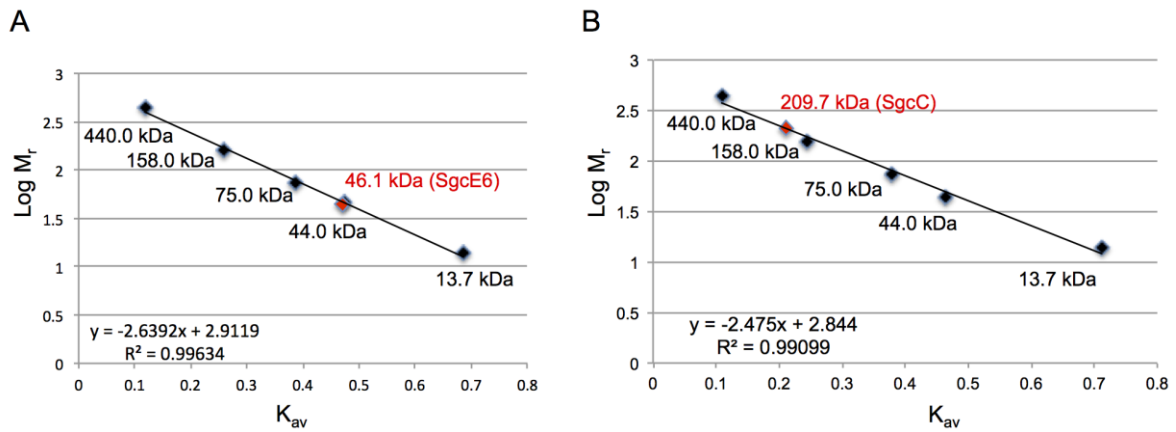

**Figure S7.** Reactions carried out by SgcC homologous enzymes.

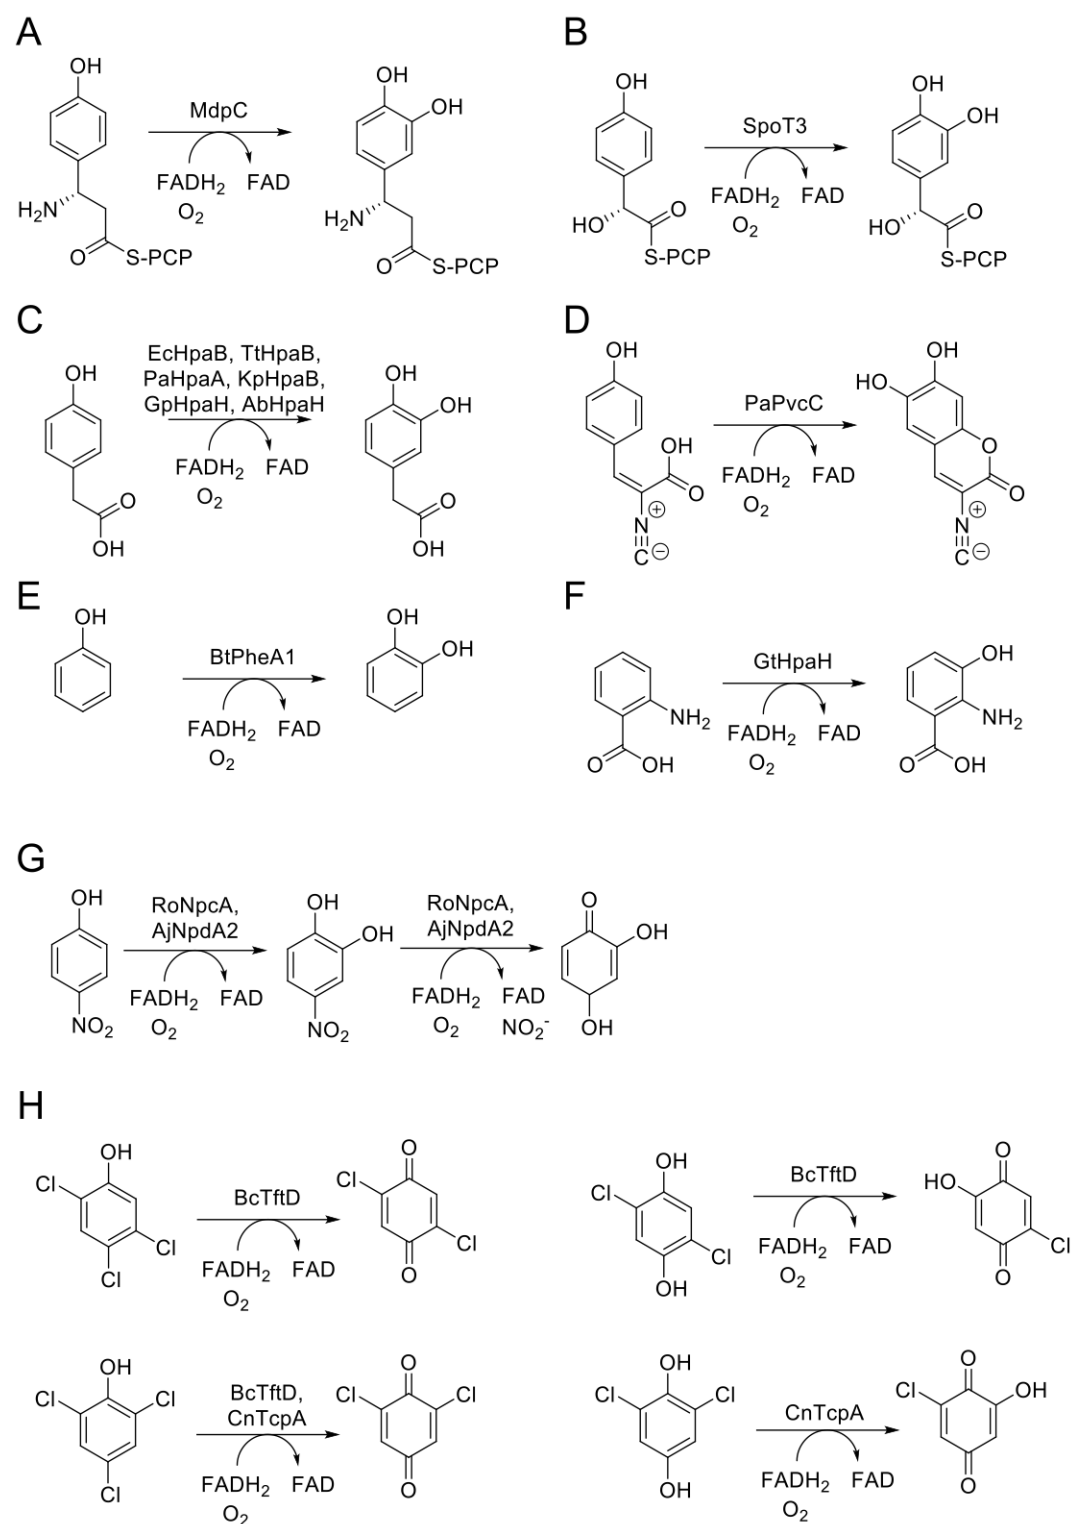

**Figure S8.** Structure based sequence alignment identity matrix. The sequences for some sequences were left out of Figure 3.

|         | SgcC | Spot3 | MdpC3 | KedY | EcHpaB | PaHpaA | PaPvcC | BtPheA1 | TtHpaB | GtHpaH | GpHpaH | BcTftD | CnTcpA | RoNpcA | AjNpdA2 |
|---------|------|-------|-------|------|--------|--------|--------|---------|--------|--------|--------|--------|--------|--------|---------|
| SgcC    | 1.00 | 0.72  | 0.72  | 0.55 | 0.49   | 0.50   | 0.40   | 0.48    | 0.29   | 0.29   | 0.26   | 0.21   | 0.20   | 0.22   | 0.21    |
| Spot3   | 0.72 | 1.00  | 0.75  | 0.57 | 0.51   | 0.51   | 0.42   | 0.50    | 0.30   | 0.29   | 0.27   | 0.21   | 0.20   | 0.22   | 0.22    |
| MdpC3   | 0.72 | 0.75  | 1.00  | 0.58 | 0.50   | 0.51   | 0.43   | 0.50    | 0.29   | 0.29   | 0.25   | 0.21   | 0.20   | 0.21   | 0.21    |
| KedY    | 0.55 | 0.57  | 0.58  | 1.00 | 0.52   | 0.53   | 0.45   | 0.49    | 0.30   | 0.30   | 0.27   | 0.22   | 0.21   | 0.23   | 0.22    |
| EcHpaB  | 0.49 | 0.51  | 0.50  | 0.52 | 1.00   | 0.72   | 0.41   | 0.48    | 0.26   | 0.27   | 0.26   | 0.22   | 0.20   | 0.21   | 0.21    |
| PaHpaA  | 0.50 | 0.51  | 0.51  | 0.53 | 0.72   | 1.00   | 0.42   | 0.50    | 0.27   | 0.27   | 0.27   | 0.21   | 0.20   | 0.23   | 0.20    |
| PaPvcC  | 0.40 | 0.42  | 0.43  | 0.45 | 0.41   | 0.42   | 1.00   | 0.44    | 0.27   | 0.31   | 0.25   | 0.20   | 0.20   | 0.22   | 0.21    |
| BtPheA1 | 0.48 | 0.50  | 0.50  | 0.49 | 0.48   | 0.50   | 0.44   | 1.00    | 0.29   | 0.29   | 0.29   | 0.23   | 0.22   | 0.24   | 0.22    |
| TtHpaB  | 0.29 | 0.30  | 0.29  | 0.30 | 0.26   | 0.27   | 0.27   | 0.29    | 1.00   | 0.41   | 0.47   | 0.23   | 0.24   | 0.25   | 0.23    |
| GtHpaH  | 0.29 | 0.29  | 0.29  | 0.30 | 0.27   | 0.27   | 0.31   | 0.29    | 0.41   | 1.00   | 0.35   | 0.22   | 0.22   | 0.22   | 0.20    |
| GpHpaH  | 0.26 | 0.27  | 0.25  | 0.27 | 0.26   | 0.27   | 0.25   | 0.29    | 0.47   | 0.35   | 1.00   | 0.21   | 0.20   | 0.20   | 0.19    |
| BcTftD  | 0.21 | 0.21  | 0.21  | 0.22 | 0.22   | 0.21   | 0.20   | 0.23    | 0.23   | 0.22   | 0.21   | 1.00   | 0.65   | 0.43   | 0.41    |
| CnTcpA  | 0.20 | 0.20  | 0.20  | 0.21 | 0.20   | 0.20   | 0.20   | 0.22    | 0.24   | 0.22   | 0.20   | 0.65   | 1.00   | 0.43   | 0.43    |
| RoNpcA  | 0.22 | 0.22  | 0.21  | 0.23 | 0.21   | 0.23   | 0.22   | 0.24    | 0.25   | 0.22   | 0.20   | 0.43   | 0.43   | 1.00   | 0.71    |
| AjNpdA2 | 0.21 | 0.22  | 0.21  | 0.22 | 0.21   | 0.20   | 0.21   | 0.22    | 0.23   | 0.20   | 0.19   | 0.41   | 0.43   | 0.71   | 1.00    |

**Figure S9.** Comparison of SgcC and TtHpaB in stereograms. Colors correspond to sequence alignment in Figure 3. (A) Apo TtHpaB is in white and bright colors, SgcC is in gray and dark colors. (B) Apo TtHpaB is similar to panel A, FAD bound TtHpaB is in gray and dark colors. (C) FAD/4-HPA bound TtHpaB is in white and bright colors and FAD bound TtHpaB is similar to panel B. The conformation of the active site loops of TtHpaB changes upon FAD and 4-HPA binding. The conformations seen in SgcC are similar to those of apo TtHpaB.

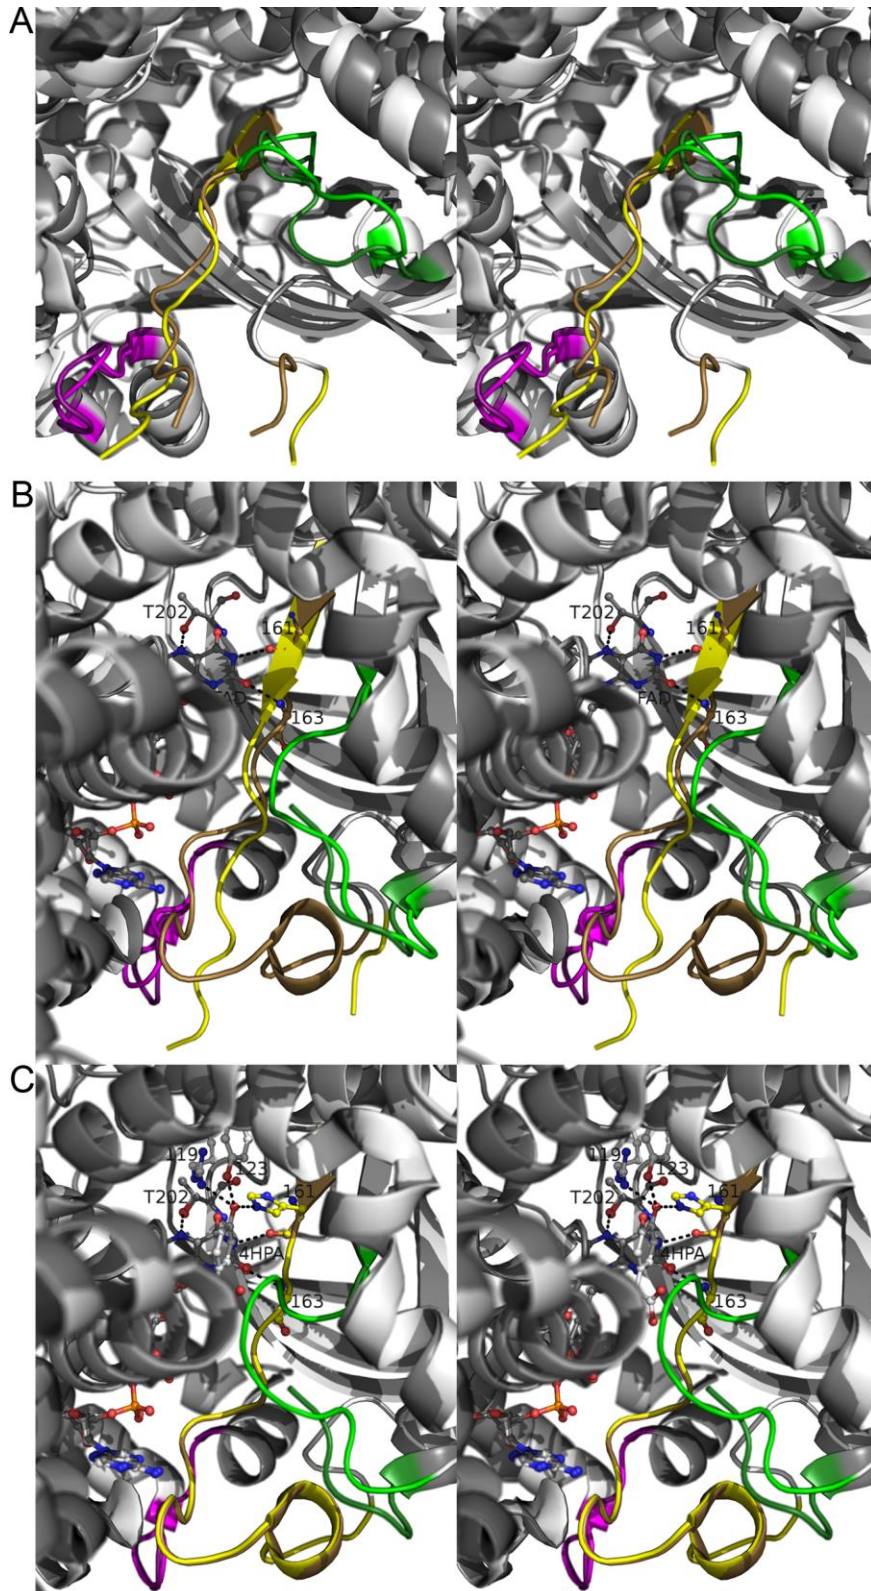

**Figure S10.** Active site of AbHpaH. The residues are colored similarly to Figure 4C, as the structures of acyl-CoA dehydrogenases and AbHpaH are very similar. The backbone atoms and S171 bind the flavin ring similarly to those of TtHpaB, revealing a conserved flavin binding mode when compared to Figure 5B. The residues bonding to the phenol of 4HPA in TtHpaB/SgcC differ from AbHpaH, nevertheless the C3 carbons of 4HPA in both AbHpaH and TtHpaB are approximately 5 angstroms from the C4a of the flavin. This reveals that residues H120 and S146 of AbHpaH serve similar roles as Y123 and H161 of SgcC/TtHpaB. The residue H396 of AbHpaH likely fulfils the role of R119 of SgcC/TtHpaB, which is likely to form and stabilize the C4a-hydroperoxyflavin intermediate.

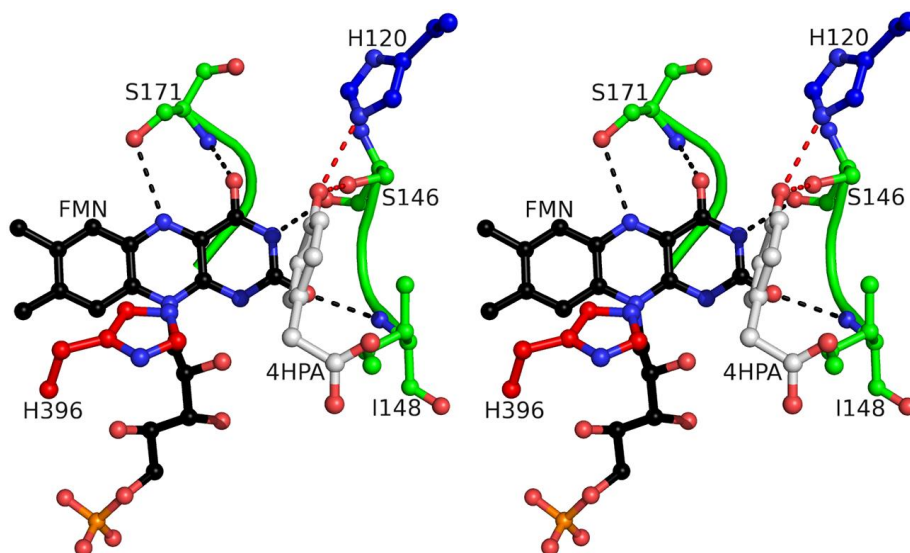



**Figure S11.** The SgcC-SgcC2 docking model. (a) The functional residues Ser31 (phosphopantetheine-anchored residue, shown in magenta) of SgcC2 points toward the active center of SgcC. (b) SgcC2 is bound at the center of the SgcC tetramer. The four subunits of SgcC are shown in green, cyan, yellow, and blue, respectively, and SgcC2 is shown in gray. The active center of SgcC is shown by *red* dotted circle. (c) The analysis statistics of the interactions between the SgcC tetramer and SgcC2.

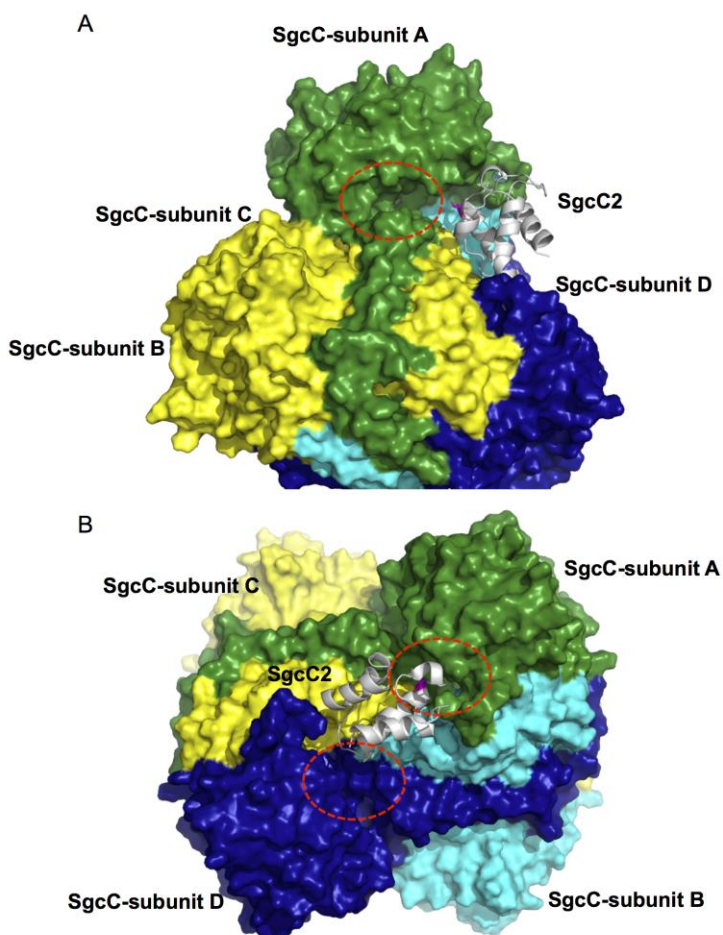

**C**

**Hydrogen bonds**

|   | SgcC-subunit A | Dist. [Å] | SgcC2         |
|---|----------------|-----------|---------------|
| 1 | ARG 170[ NH1 ] | 3.70      | GLN 30[ OE1 ] |
| 2 | ARG 170[ NH1 ] | 3.39      | GLY 28[ O ]   |
| 3 | ARG 170[ NH2 ] | 2.87      | VAL 13[ O ]   |
| 4 | ARG 170[ NH2 ] | 3.30      | GLY 28[ O ]   |
| 5 | LYS 220 [ H ]  | 2.48      | ILE 25[ O ]   |

|   | SgcC-subunit B | Dist. [Å] | SgcC2         |
|---|----------------|-----------|---------------|
| 1 | ARG 337[ NH1 ] | 2.78      | GLU 43[ OE2 ] |
| 2 | GLY 332 [ O ]  | 3.63      | ARG 36[ NH2 ] |

**Salt bridges**

|   | SgcC-subunit B | Dist. [Å] | SgcC2         |
|---|----------------|-----------|---------------|
| 1 | ARG 337[ NH1 ] | 2.78      | GLU 43[ OE2 ] |
| 2 | ASP 335[ OD2 ] | 3.61      | ARG 36[ NE ]  |

## References

- (1) Van Lanen, S. G., Lin, S., Horsman, G. P., and Shen, B. (2009) Characterization of SgcE6, the flavin reductase component supporting FAD-dependent halogenation and hydroxylation in the biosynthesis of the enediyne antitumor antibiotic C-1027. *FEMS Microbiol. Lett.* 300, 237-241.
- (2) Kim, S. H., Hisano, T., Iwasaki, W., Ebihara, A., and Miki, K. (2008) Crystal structure of the flavin reductase component (HpaC) of 4-hydroxyphenylacetate 3-monooxygenase from *Thermus thermophilus* HB8: Structural basis for the flavin affinity. *Proteins* 70, 718-730.
- (3) Kirchner, U., Westphal, A. H., Muller, R., and van Berkel, W. J. (2003) Phenol hydroxylase from *Bacillus thermoglucosidasius* A7, a two-protein component monooxygenase with a dual role for FAD. *J. Biol. Chem.* 278, 47545-47553.
- (4) van den Heuvel, R. H., Westphal, A. H., Heck, A. J., Walsh, M. A., Rovida, S., van Berkel, W. J., and Mattevi, A. (2004) Structural studies on flavin reductase PheA2 reveal binding of NAD in an unusual folded conformation and support novel mechanism of action. *J. Biol. Chem.* 279, 12860-12867.
- (5) Webb, B. N., Ballinger, J. W., Kim, E., Belchik, S. M., Lam, K. S., Youn, B., Nissen, M. S., Xun, L., and Kang, C. (2010) Characterization of chlorophenol 4-monooxygenase (TftD) and NADH:FAD oxidoreductase (TftC) of *Burkholderia cepacia* AC1100. *J. Biol. Chem.* 285, 2014-2027.
- (6) Otto, K., Hofstetter, K., Rothlisberger, M., Witholt, B., and Schmid, A. (2004) Biochemical characterization of StyAB from *Pseudomonas* sp. strain VLB120 as a two-component flavin-diffusible monooxygenase. *J. Bacteriol.* 186, 5292-5302.
- (7) Zhang, Y., Edwards, T. E., Begley, D. W., Abramov, A., Thompkins, K. B., Ferrell, M., Guo, W. J., Phan, I., Olsen, C., Napuli, A., Sankaran, B., Stacy, R., Van Voorhis, W. C., Stewart, L. J., and Myler, P. J. (2011) Structure of nitrilotriacetate monooxygenase component B from *Mycobacterium thermoresistibile*. *Acta Cryst. F67*, 1100-1105.
- (8) Okai, M., Kudo, N., Lee, W. C., Kamo, M., Nagata, K., and Tanokura, M. (2006) Crystal structures of the short-chain flavin reductase HpaC from *Sulfolobus tokodaii* strain 7 in its three states: NAD(P)(+)(-)-free, NAD(+)(-)-bound, and NADP(+)(-)-bound. *Biochemistry* 45, 5103-5110.
- (9) Steinkellner, G., Gruber, C. C., Pavkov-Keller, T., Binter, A., Steiner, K., Winkler, C., Lyskowski, A., Schwamberger, O., Oberer, M., Schwab, H., Faber, K., Macheroux, P., and Gruber, K. (2014) Identification of promiscuous ene-reductase activity by mining structural databases using active site constellations. *Nat. Commun.* 5, 4150.
- (10) Christendat, D., Yee, A., Dharamsi, A., Kluger, Y., Savchenko, A., Cort, J. R., Booth, V., Mackereth, C. D., Saridakis, V., Ekiel, I., Kozlov, G., Maxwell, K. L., Wu, N., McIntosh, L. P., Gehring, K., Kennedy, M. A., Davidson, A. R., Pai, E. F., Gerstein, M., Edwards, A. M., and Arrowsmith, C. H. (2000) Structural proteomics of an archaeon. *Nat. Struct. Biol.* 7, 903-909.
- (11) Chiu, H. J., Johnson, E., Schroder, I., and Rees, D. C. (2001) Crystal structures of a novel ferric reductase from the hyperthermophilic archaeon *Archaeoglobus fulgidus* and its complex with NADP<sup>+</sup>. *Structure* 9, 311-319.
- (12) Vadas, A., Monbouquette, H. G., Johnson, E., and Schroder, I. (1999) Identification and characterization of a novel ferric reductase from the hyperthermophilic Archaeon *Archaeoglobus fulgidus*. *J. Biol. Chem.* 274, 36715-36721.
- (13) Galan, B., Diaz, E., Prieto, M. A., and Garcia, J. L. (2000) Functional analysis of the small component of the 4-hydroxyphenylacetate 3-monooxygenase of *Escherichia coli*

- W: a prototype of a new Flavin:NAD(P)H reductase subfamily. *J. Bacteriol.* 182, 627-636.
- (14) Lin, S., Van Lanen, S. G., and Shen, B. (2008) Characterization of the two-component, FAD-dependent monooxygenase SgcC that requires carrier protein-tethered substrates for the biosynthesis of the enediyne antitumor antibiotic C-1027. *J. Am. Chem. Soc.* 130, 6616-6623.
  - (15) Kim, S. H., Hisano, T., Takeda, K., Iwasaki, W., Ebihara, A., and Miki, K. (2007) Crystal structure of the oxygenase component (HpaB) of the 4-hydroxyphenylacetate 3-monooxygenase from *Thermus thermophilus* HB8. *J. Biol. Chem.* 282, 33107-33117.
  - (16) Hayes, R. P., Webb, B. N., Subramanian, A. K., Nissen, M., Popchock, A., Xun, L., and Kang, C. (2012) Structural and Catalytic Differences between Two FADH(2)-Dependent Monooxygenases: 2,4,5-TCP 4-Monooxygenase (TftD) from *Burkholderia cepacia* AC1100 and 2,4,6-TCP 4-Monooxygenase (TcpA) from *Cupriavidus necator* JMP134. *Int. J. Mol. Sci.* 13, 9769-9784.
  - (17) Chakraborty, S., Ortiz-Maldonado, M., Entsch, B., and Ballou, D. P. (2010) Studies on the mechanism of p-hydroxyphenylacetate 3-hydroxylase from *Pseudomonas aeruginosa*: a system composed of a small flavin reductase and a large flavin-dependent oxygenase. *Biochemistry* 49, 372-385.
  - (18) Furuya, T., and Kino, K. (2014) Catalytic activity of the two-component flavin-dependent monooxygenase from *Pseudomonas aeruginosa* toward cinnamic acid derivatives. *Appl. Microbiol. Biotechnol.* 98, 1145-1154.
  - (19) Prieto, M. A., Diaz, E., and Garcia, J. L. (1996) Molecular characterization of the 4-hydroxyphenylacetate catabolic pathway of *Escherichia coli* W: engineering a mobile aromatic degradative cluster. *J. Bacteriol.* 178, 111-120.
  - (20) Xun, L., and Sandvik, E. R. (2000) Characterization of 4-hydroxyphenylacetate 3-hydroxylase (HpaB) of *Escherichia coli* as a reduced flavin adenine dinucleotide-utilizing monooxygenase. *Appl. Environ. Microbiol.* 66, 481-486.
  - (21) Prieto, M. A., and Garcia, J. L. (1994) Molecular characterization of 4-hydroxyphenylacetate 3-hydroxylase of *Escherichia coli*. A two-protein component enzyme. *J. Biol. Chem.* 269, 22823-22829.
  - (22) Duffner, F. M., Kirchner, U., Bauer, M. P., and Muller, R. (2000) Phenol/cresol degradation by the thermophilic *Bacillus thermoglucosidasius* A7: cloning and sequence analysis of five genes involved in the pathway. *Gene* 256, 215-221.
  - (23) Stintzi, A., Johnson, Z., Stonehouse, M., Ochsner, U., Meyer, J. M., Vasil, M. L., and Poole, K. (1999) The pvc gene cluster of *Pseudomonas aeruginosa*: role in synthesis of the pyoverdine chromophore and regulation by PtxR and PvdS. *J. Bacteriol.* 181, 4118-4124.
  - (24) Clarke-Pearson, M. F., and Brady, S. F. (2008) Paerucumarin, a new metabolite produced by the pvc gene cluster from *Pseudomonas aeruginosa*. *J. Bacteriol.* 190, 6927-6930.
  - (25) Liu, X., Dong, Y., Li, X., Ren, Y., Li, Y., Wang, W., Wang, L., and Feng, L. (2010) Characterization of the anthranilate degradation pathway in *Geobacillus thermodenitrificans* NG80-2. *Microbiology* 156, 589-595.
  - (26) Hawumba, J. F., Brozel, V. S., and Theron, J. (2007) Cloning and characterization of a 4-hydroxyphenylacetate 3-hydroxylase from the thermophile *Geobacillus* sp. PA-9. *Curr. Microbiol.* 55, 480-484.
  - (27) Kadiyala, V., and Spain, J. C. (1998) A two-component monooxygenase catalyzes both the hydroxylation of p-nitrophenol and the oxidative release of nitrite from 4-nitrocatechol in *Bacillus sphaericus* JS905. *Appl. Environ. Microbiol.* 64, 2479-2484.

- (28) Perry, L. L., and Zylstra, G. J. (2007) Cloning of a gene cluster involved in the catabolism of p-nitrophenol by *Arthrobacter* sp. strain JS443 and characterization of the p-nitrophenol monooxygenase. *J. Bacteriol.* 189, 7563-7572.
- (29) Moncoq, K., Regad, L., Mann, S., Mejean, A., and Ploux, O. (2013) Structure of the prolyl-acyl carrier protein oxidase involved in the biosynthesis of the cyanotoxin anatoxin-a. *Acta Cryst. D69*, 2340-2352.
- (30) Watanabe, K., Khosla, C., Stroud, R. M., and Tsai, S. C. (2003) Crystal structure of an Acyl-ACP dehydrogenase from the FK520 polyketide biosynthetic pathway: insights into extender unit biosynthesis. *J. Mol. Biol.* 334, 435-444.
- (31) Alfieri, A., Fersini, F., Ruangchan, N., Prongjit, M., Chaiyen, P., and Mattevi, A. (2007) Structure of the monooxygenase component of a two-component flavoprotein monooxygenase. *Proc. Natl. Acad. Sci. USA* 104, 1177-1182.
- (32) Li, Y., Llewellyn, N. M., Giri, R., Huang, F., and Spencer, J. B. (2005) Biosynthesis of the unique amino acid side chain of butirosin: possible protective-group chemistry in an acyl carrier protein-mediated pathway. *Chem. Biol.* 12, 665-675.
